# Supplementary material for: Suppression of Lipid Accumulation by Indole-3-Carbinol Is Associated with Increased Expression of the Aryl Hydrocarbon Receptor and CYP1B1 Proteins in Adipocytes and with Decreased Adipocyte-Stimulated Endothelial Tube Formation
Source: MDPI journal article supplement (doi:10.3390/ijms17081256), 2016-08-03
Supplement: s1 [file s1]

## Supplementary Information: Suppression of Lipid Accumulation by Indole-3-Carbinol Is Associated with Increased Expression of the Aryl Hydrocarbon Receptor and CYP1B1 Proteins in Adipocytes and with Decreased Adipocyte-Stimulated Endothelial Tube Formation

Mei-Lin Wang, Shyh-Hsiang Lin, Yuan-Yu Hou and Yue-Hwa Chen

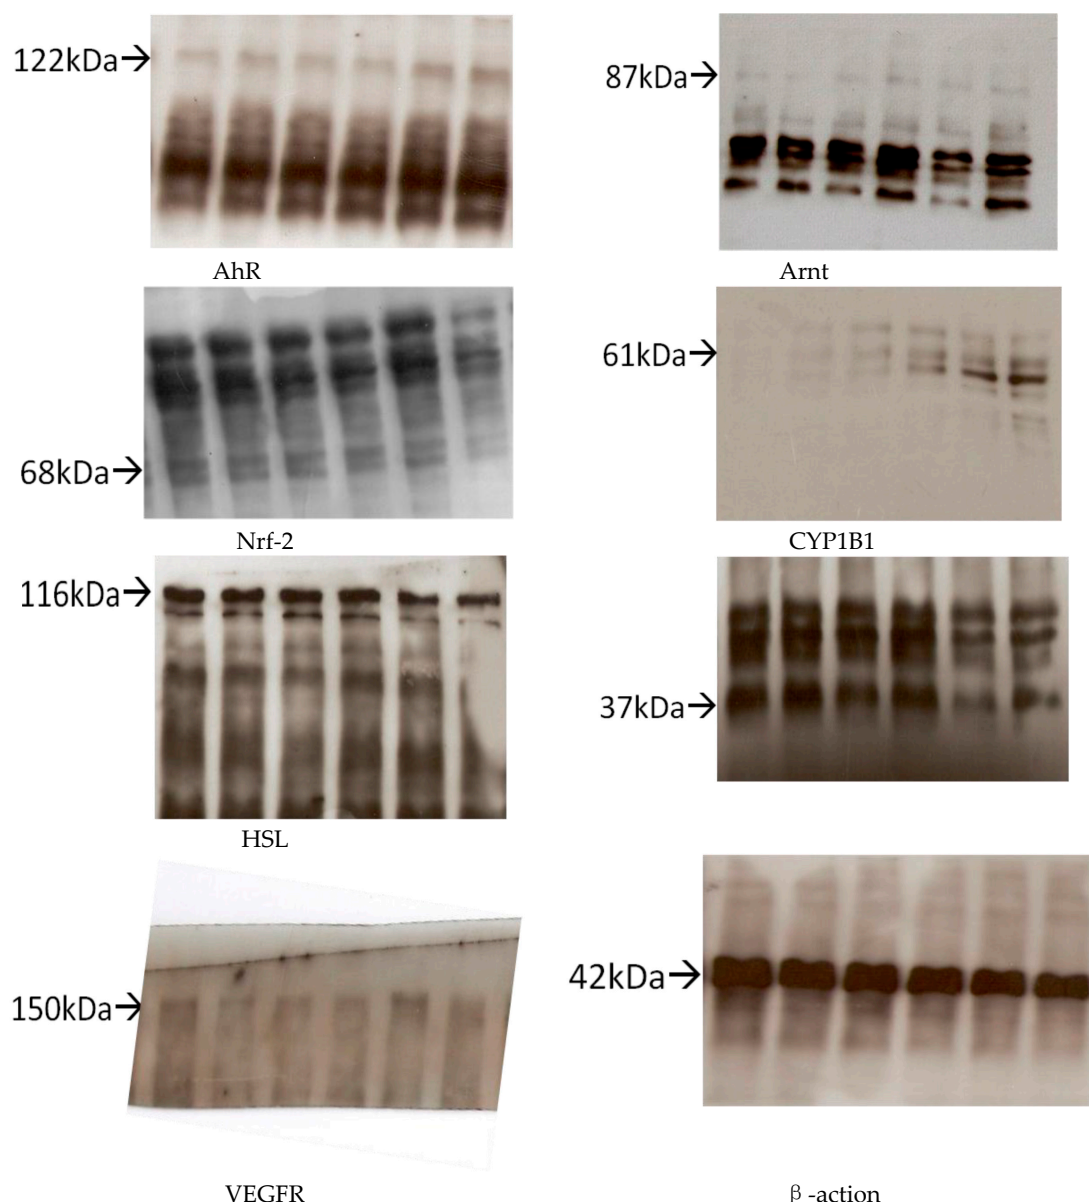

Figure S1. Original blots for each protein.
